# Supplementary material for: The M18 aspartyl aminopeptidase of Plasmodium falciparum binds to human erythrocyte spectrin in vitro
Source: Springer Nature journal article supplement (doi:10.1186/1475-2875-7-161), 2008-08-22
Supplement: Additional file 1 [file 1475-2875-7-161-s1.pdf]

*Hs* --TEPHVRMVTLYDNE**EE**VGSESAQGAQS-----LLTELVLRRISASCQH-----PTAFEEAIP----KSFMISAD**MA**HAV**HP**NYLDKHE 360  
*Sc* --RESGIRLMACFDH**EE**IGSSSAQGADSNFLPNILERLSILKGDGSDQT-----KPLFHSAILETSAKSFFLSS**D**VAHAV**HP**NYANKYE 376  
*Pf* DNIHNNLYISIGYDH**EE**IGSLSEVGARSYCTKNFIDRIISSVFKKEIHE-----KNLSVQEIYGNLVNRSFILNV**D**MAHCS**HP**NYPETVQ 448  
*Pc* EPLENNLYICIGYDH**EE**IGSLSEIGAQSFTKSFIERIIGNIFKNELKN-----NETTVDEIYGSLSSRSLILNV**D**MAHCG**HP**NYPETIQ 376  
*Py* --LGNNLYICIGYDH**EE**IGSLSEIGAQSFTKSFIERILGNIFKNELKN-----NDITIDEIYGSLSNRSLILNV**D**MAHCG**HP**NYPETIQ 390  
*Pk* PEAHANLYICIGYDH**EE**IGSLSEVGAQSFTQNFIKRILTAISSQVGQNTHP-----SSPTSIDELYGSLMSRSLILNV**D**MAHCS**HP**NYPETVQ 412  
*Pv* PGAHANLYICIGYDH**EE**IGSLSEVGAQSFTQNFIKRILAAVCSHACDAASATTSSAATASAPPSIDELYGSLMSRSLLLNV**D**MAHCS**HP**NYPETVQ 432  
: : :\*:\*\*:\* \* \* \* \* : : . . . . :\*::: . \*:\* . \*\*\*\* :. :

*Hs* ENHRPLFHKGFPVIKVN**SK**QRYASNAVSEALIR-----EVANKVKVPLQDLMVRNDTPCGTTIGPILASRLGLRVLDLGGSPQLAM**HS**IREMACTTGVL 452  
*Sc* SQHKPLLGGGPVIKINANQRYMTNSPGLVLVK-----RLAEAAKVPLQLFVVANDSPCGSTIGPILASKTGIRTLDLGNPVL**SM**HSIRETGG**SAD**LE 468  
*Pf* DNHQQLFFHEGIAIKYNTNKNYVTSPLHASLIKRTFELYYNKYKQIQIKYQNFMVKNDTPCGSTVGS**MVA**ANLSMPGIDIGIPQLAM**HS**IREIAAVHDVF 546  
*Pc* QSHHLRFH**DG**IAIKYNTNKNYVTS**PYY**ACLLKRTFELYQ**NQYNQ**KIKYQNFMIKNDTPCGSTVGS**MVA**SNLSMPGMDIGISQLAM**HS**IREIAAIHDIY 474  
*Py* QNHHLRFHEGIAIKYNTNKNYVTS**PYY**ACLLKRTFELYQ**NQNNQ**KIKYQNFMIKNDTPCGSTVGS**MVA**ANLSMPGMDIGIPQLAM**HS**IRELAAIHDIY 488  
*Pk* ANHQQLFFHEGIAIKYNTNRNYATSPYYTCLLKRTFELFTSKFNEKIKYQNFMVKNDTPCGSTVGS**MVA**SNLSMPGVDIGIPQLAM**HS**IREIAAVRDIY 510  
*Pv* ASHQQLFFHEGIAIKYNTNKNYVTS**PYY**TCLLKRTFELFASNFNEKIKYQNFMVKNDTPCGSTVGS**MVA**ANLSMPGIDIGIPQLAM**HS**IREIAAVRDVY 530  
.\*: : \* .\*\* \*:::\* :.. \*:: : : \* :: : \*\*:\*:\*:\*:\*:\*:\*:\*:\*:\* : : :\*:\* . \*:\*:\*:\*:\* . . :

*Hs* QTLTTLFKGFFELF**PS**LSHNLLVD- 475  
*Sc* FQIKLFKEFFERYTSIESEIVV-- 490  
*Pf* FLIKGVFAFYTYYNQVLSTCVHDK 570  
*Pc* YLIKGVFAFYAYYNQVLSTCVHDA 498  
*Py* YLVKGIFAFYAYYNQVLSSCVHDS 512  
*Pk* YLVKGILAFYTYYSHVHASCVPDE 534  
*Pv* YLVKGVLAFYAYYSHVLASCVDA 554  
:. . \* : : : :
